# Supplementary material
Source: Elsevier journal article supplement (https://www.sciencedirect.com/science/article/pii/S1695403319301973)
Supplement: mmc1 [file S1695403319301973:mmc1.docx]

**Anexo. Autores. Grupo de trabajo del Observatorio de lesiones no intencionadas**

**de la Red de Investigación de la Sociedad Española de Urgencias de Pediatría**

**(RiSeup-Sperg)**

- Eduardo J. Bardón Cancho, Servicio de Urgencias Pediátricas, Hospital General

Universitario Gregorio Marañón, Madrid, España.

- Cristina Arribas Sánchez, Servicio de Urgencias Pediátricas, Hospital General

Universitario Gregorio Marañón, Madrid, España.

- Arístides Rivas García, Servicio de Urgencias Pediátricas, Hospital General

Universitario Gregorio Marañón, Madrid, España.

- Rafael Marañón Pardillo, Servicio de Urgencias Pediátricas, Hospital General

Universitario Gregorio Marañón, Madrid, España.

- Santiago M. Fernández, Servicio de Urgencias Pediátricas, Hospital Universitario de

Cruces, Vizcaya, España.

- Santiago Mintegi, Servicio de Urgencias Pediátricas, Hospital Universitario de Cruces,

Vizcaya, España.

- Anaida Obieta, Servicio de Urgencias Pediátricas, Hospital Universitario Son Espases,

Baleares, España.

- Nuria Chaves, Servicio de Urgencias Pediátricas, Hospital Universitario Donostia,

Guipúzcoa, España.

- Claudia Farrés, Servicio de Urgencias Pediátricas, Corporació Sanitària Parc Taulí,

Sabadell, Barcelona, España.

- Gloria Estopiñá, Servicio de Urgencias Pediátricas, Consorci Sanitari de Terrassa,

Terrassa, Barcelona, España.

- Fernando David Panzino, Servicio de Urgencias Pediátricas, Hospital General del Parc

Sanitari Sant Joan de Déu, Sant Boi de Llobregat, Barcelona, España.

**Anexo 1. Autores. Grupo de trabajo del Observatorio de lesiones**

- Helvia Benito, Servicio de Urgencias Pediátricas, Hospital Nuestra Señora de

Sonsoles, Ávila, España.

- Leticia González, Servicio de Urgencias Pediátricas, Hospital Universitario Río

Hortega, Valladolid, España.

- María Amalia Pérez, Servicio de Urgencias Pediátricas, Hospital de Zumárraga,

Guipúzcoa, España.

- Agustín Rodríguez, Servicio de Urgencias Pediátricas, Hospital Alto Deba,

Guipúzcoa, España.
